# Supplementary material for: Hypoxia-preconditioned bone marrow mesenchymal stem cells alleviate acute liver failure by regulating the VEGF/c-MET pathway
Source: Research Square preprint supplement (doi:10.21203/rs.3.rs-8767424/v1), 2026-02-20
Supplement: Supplementary file 1 [file 34ac6b5580dc5bc184aacc0f.docx]

**Supplementary information**

**Hypoxia-preconditioned bone marrow mesenchymal stem cells alleviate acute liver failure by regulating the VEGF/c-Met pathway**

Mei-Mei Lan1, Rui-Zhi Shi1, Zhe-Yu Li1, Wen-Jun Qiao1, Yong-Juan Guan1, Wen-Qiang He1,2, Jun-Feng Li1,2,*, Li-Ting Zhang1,2,3,*

**Supplemental Information contents:**

Supplementary Tables S1 Page 2

**Supplemental Tables**

**Table S1. Sequences of the primers for RT-qPCR**

| **Name** | **Primer Sequence (5′ - 3′)** |
| --- | --- |
| **CXCR4-Forward primer** | TATTGTCCACGCCACCAACA |
| **CXCR4-Reverse primer** | CCAGACGCCCACATAGACTG |
| **IL-6-Forward primer** | CTTGGGACTGATGCTGGTGA |
| **IL-6-Reverse primer** | GGTCTGTTGGGAGTGGTATCC |
| **VEGF-Forward primer** | CCCACGTCAGAGAGCAACATC |
| **VEGF-Reverse primer** | CCGGGATTTCTTGCGCTTT |
| **GAPDH-Forward primer** | TCCGTGTTCCTACCCCCAAT |
| **GAPDH-Reverse primer** | GTTGCTGTTGAAGTCGCAGG |
